# Supplementary material for: All-carbocycle hydrocarbon thermosets with high thermal stability and robust mechanical strength for low-kinterlayer dielectrics
Source: Royal Society of Chemistry journal article supplement (doi:10.1039/d1py00877c), 2021-01-01
Supplement: d1py00877c1.pdf [file d1py00877c1.pdf]

## Supporting Information

# All-carbocycle hydrocarbon thermosets with high thermal stability and robust mechanical strength for low-k interlayer dielectrics

Yudi Feng, Ke Jin, Jia Guo, and Changchun Wang\*

State Key Laboratory of Molecular Engineering of Polymers and Department of Macromolecular Science,  
Laboratory of Advanced Materials, Fudan University, Shanghai 200433, P.R. China

## Contents

Fig. S1-S14.  $^1\text{H}$  and  $^{13}\text{C}$  NMR spectra of compounds 1-9, DBCOD-BCB and DBCOD-ene-BCB.

Fig. S15-S21. Mass spectra of compounds 1-9, DBCOD-BCB and DBCOD-ene-BCB.

Fig. S22-S24. GC and HPLC analysis result of compounds 5/6, compounds 7/8 and DBCOD-

BCB

Fig. S25. Rheological analysis on complex viscosity of monomers when heated from 150 °C to 250 °C with a ramping rate of 10 °C/min in air.

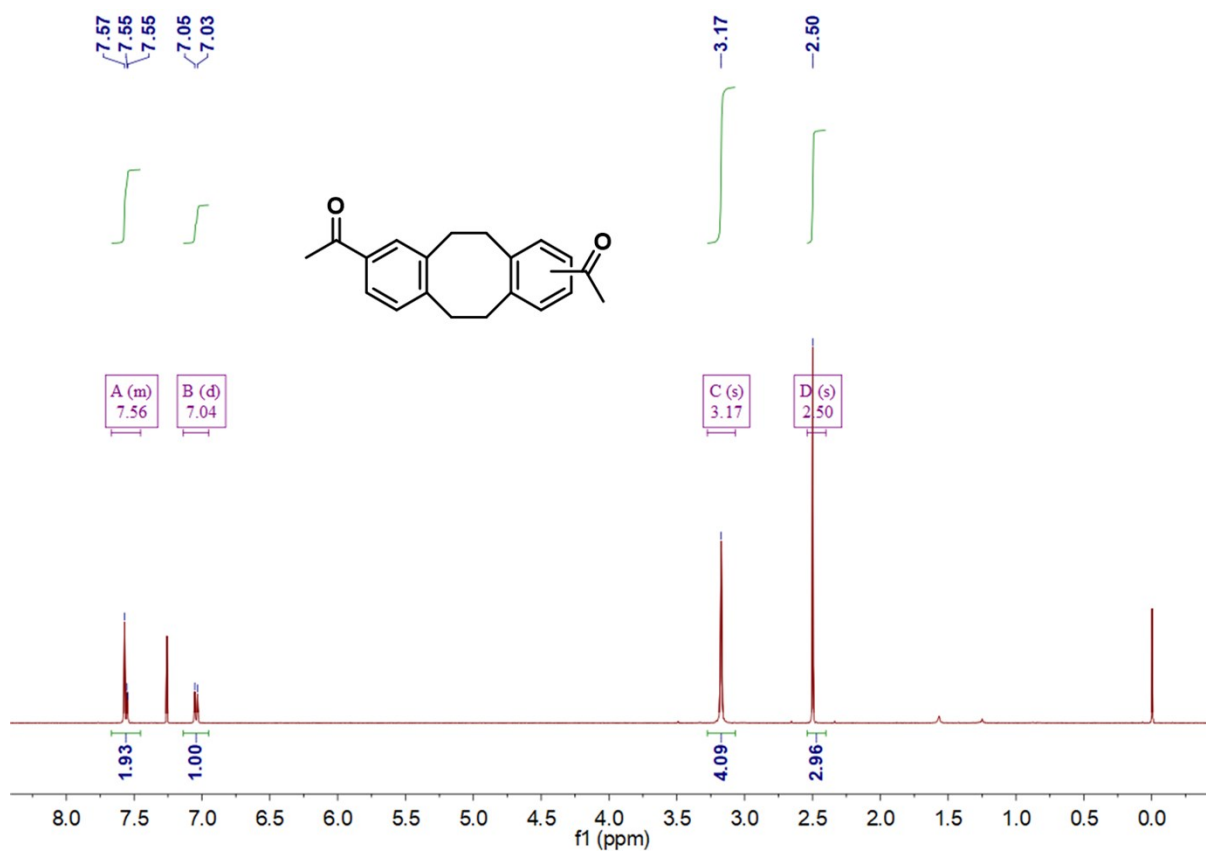

**Fig. S1**  $^1\text{H}$  NMR spectrum of the mixture of compounds **1** and **2** in  $\text{CDCl}_3$ .

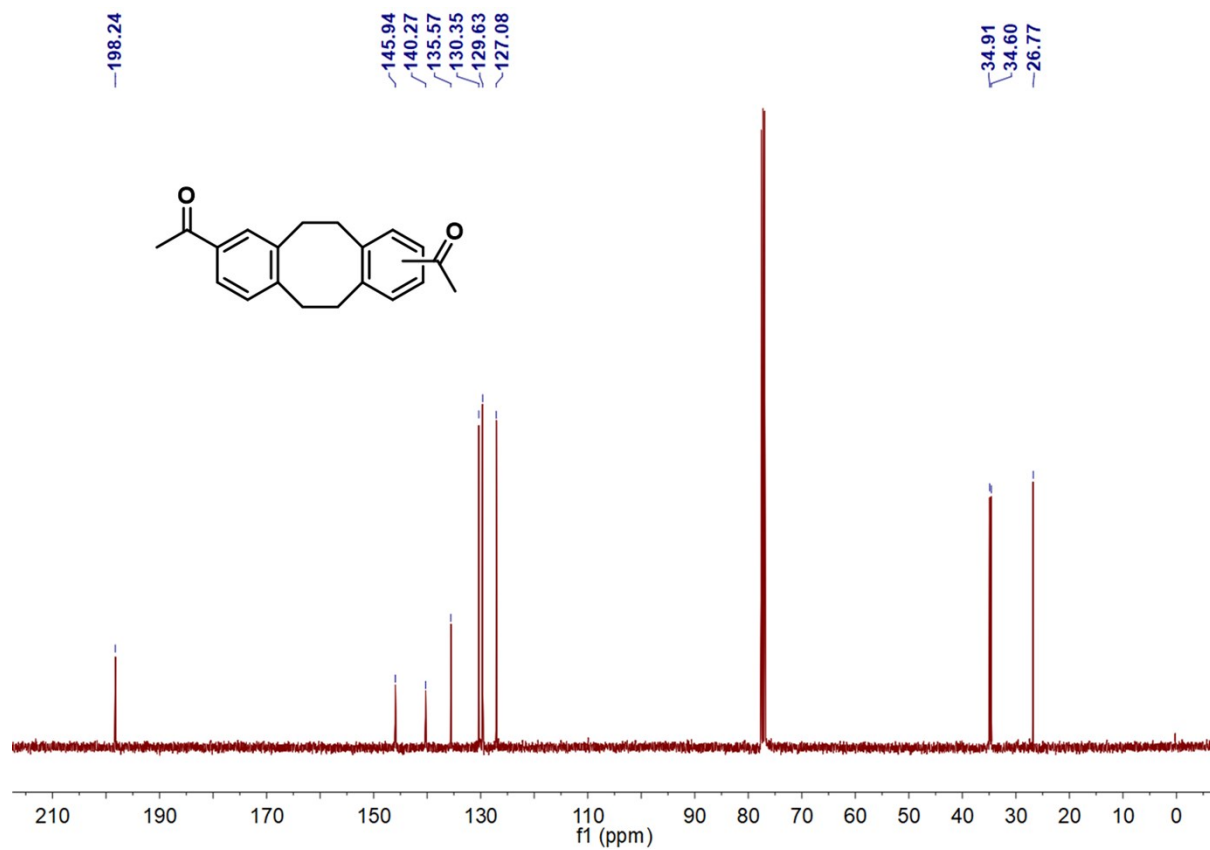

**Fig. S2**  $^{13}\text{C}$  NMR spectrum of the mixture of compounds 1 and 2 in  $\text{CDCl}_3$ .

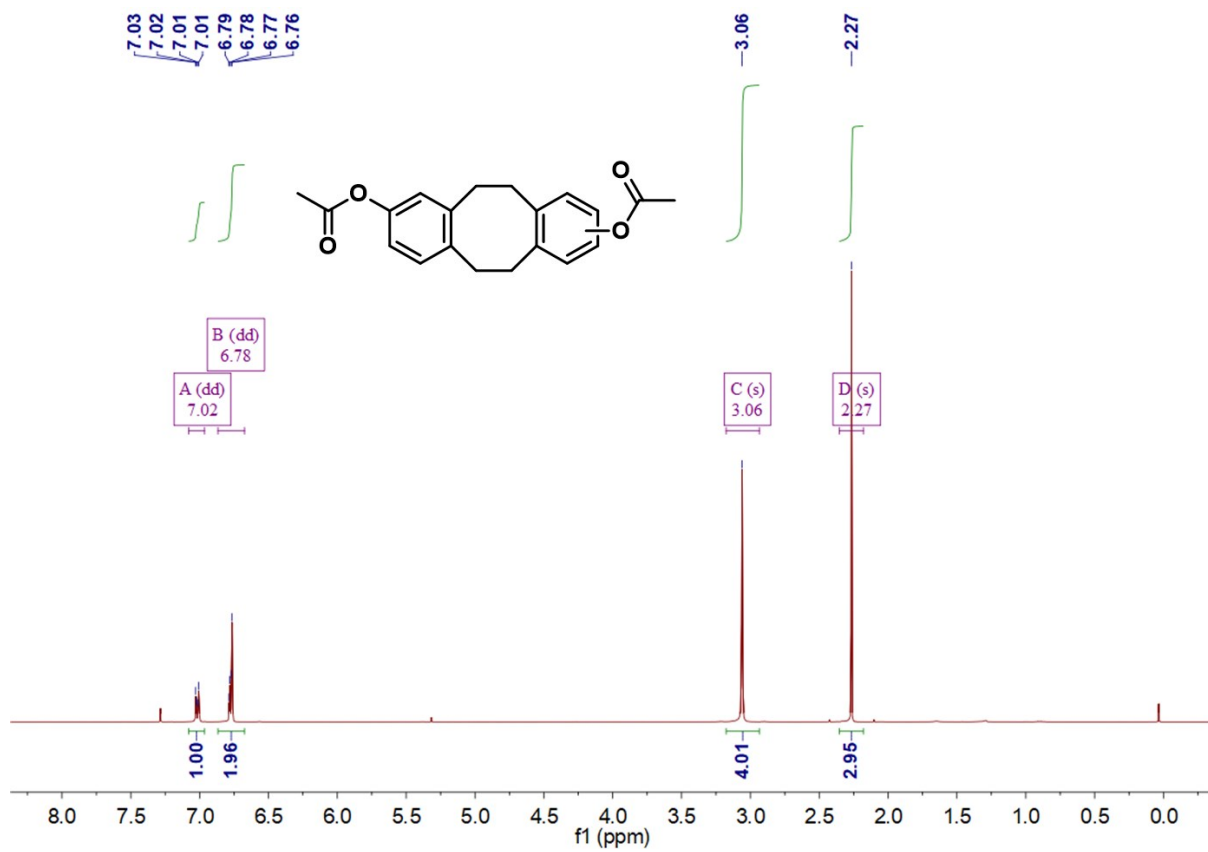

**Fig. S3**  $^1\text{H}$  NMR spectrum of the mixture of compounds **3** and **4** in  $\text{CDCl}_3$ .

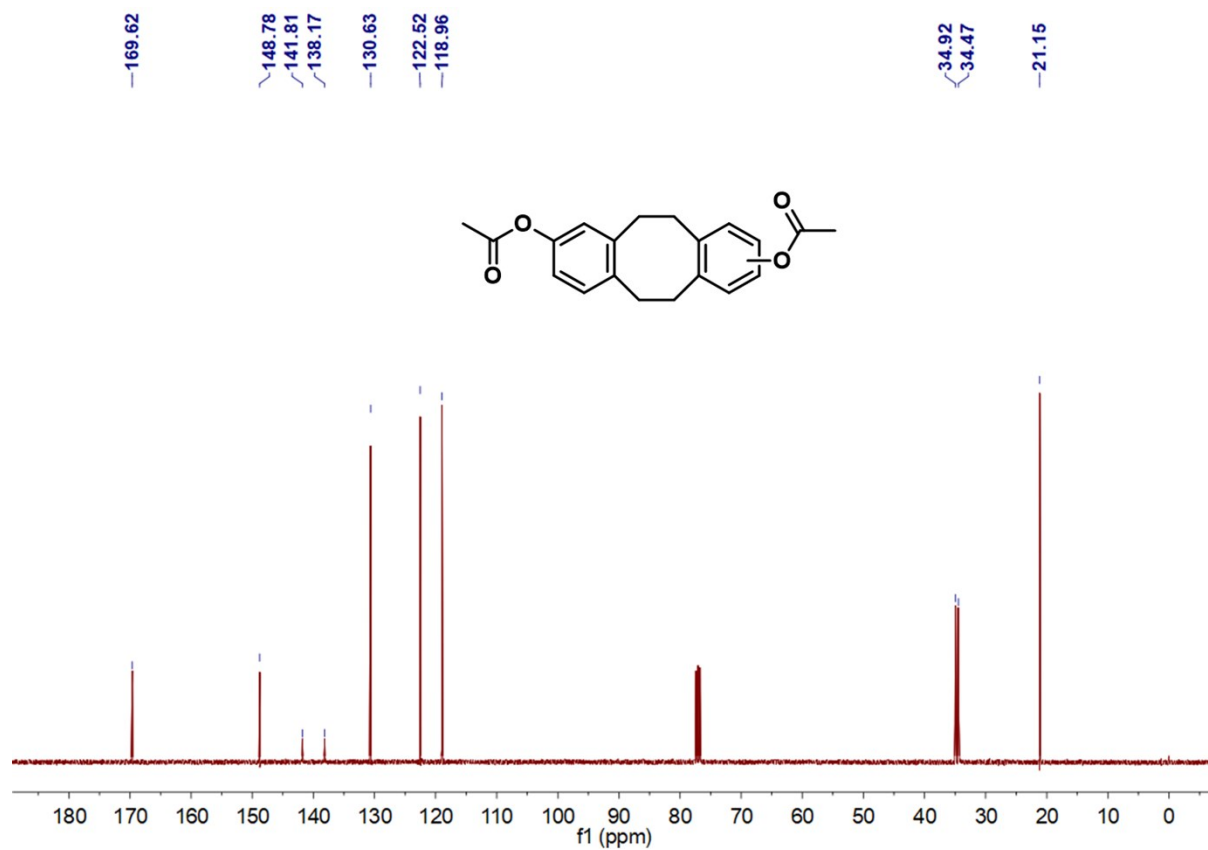

**Fig. S4** <sup>13</sup>C NMR spectrum of the mixture of compounds **3** and **4** in CDCl<sub>3</sub>.

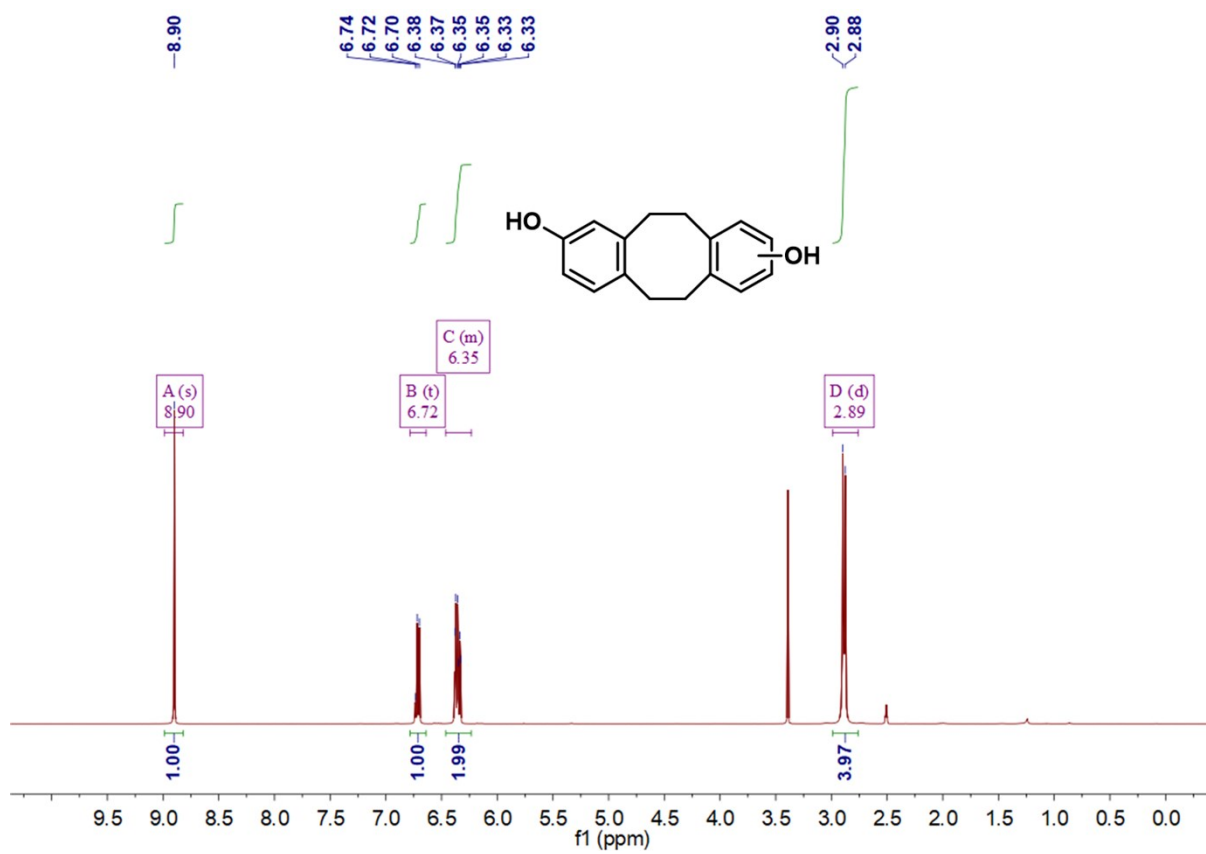

**Fig. S5**  $^1\text{H}$  NMR spectrum of the mixture of compounds **5** and **6** in  $\text{DMSO-}d_6$ .

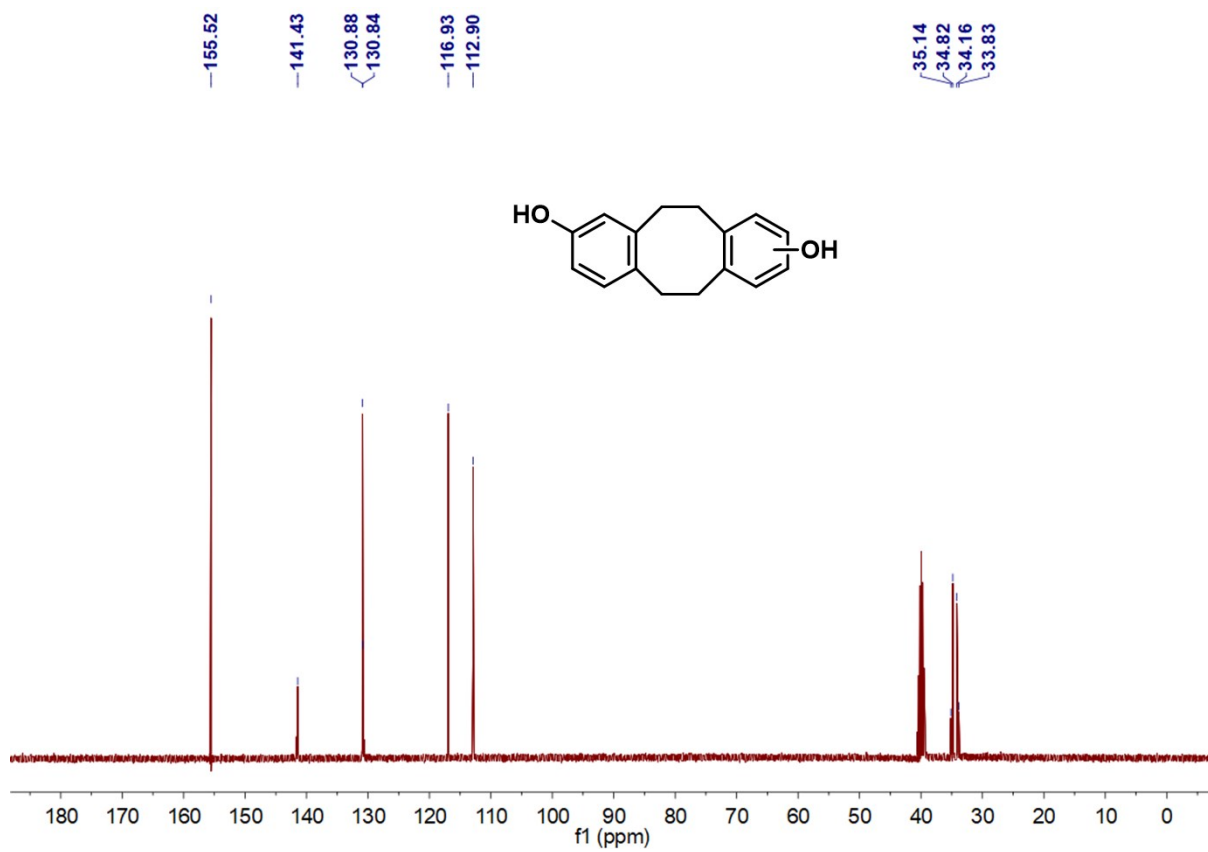

**Fig. S6**  $^{13}\text{C}$  NMR spectrum of the mixture of compounds 5 and 6 in  $\text{DMSO-}d_6$ .



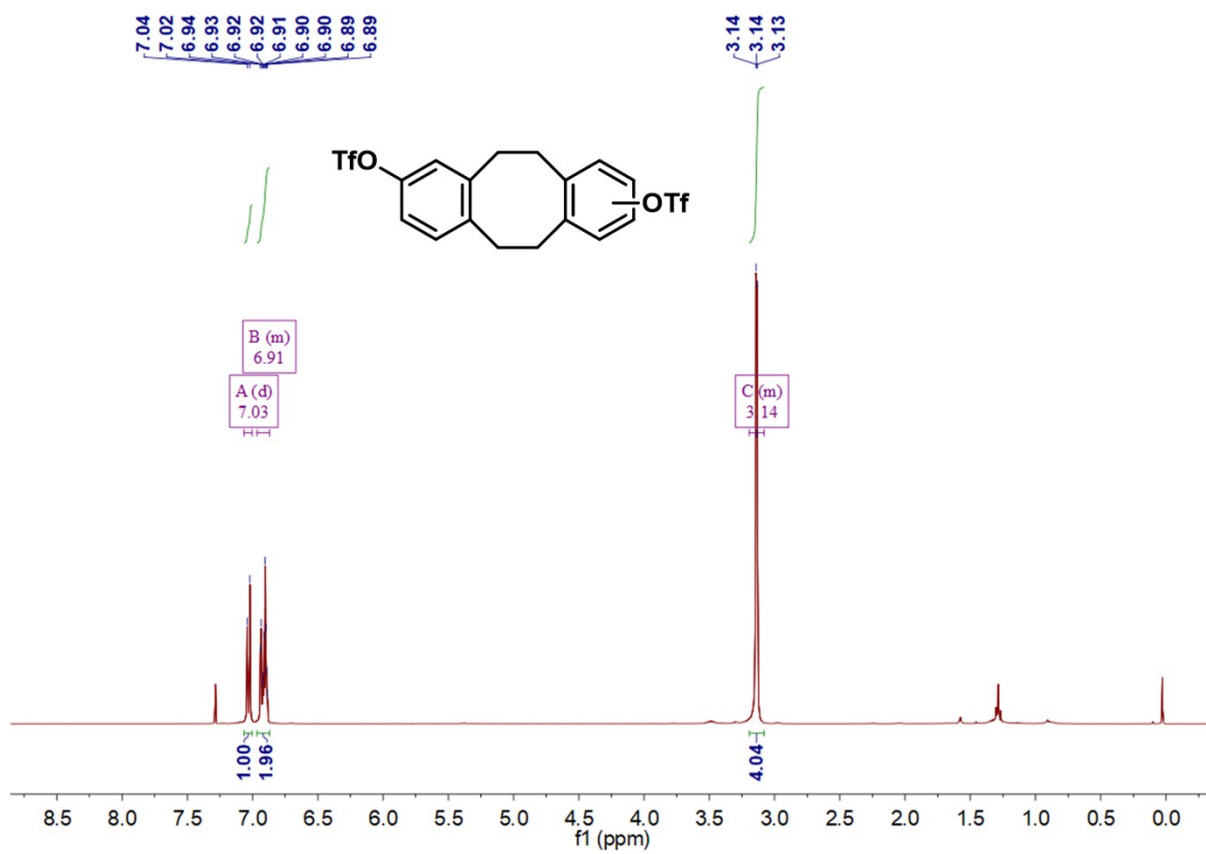

**Fig. S7**  $^1\text{H}$  NMR spectrum of the mixture of compounds **7** and **8** in  $\text{CDCl}_3$ .

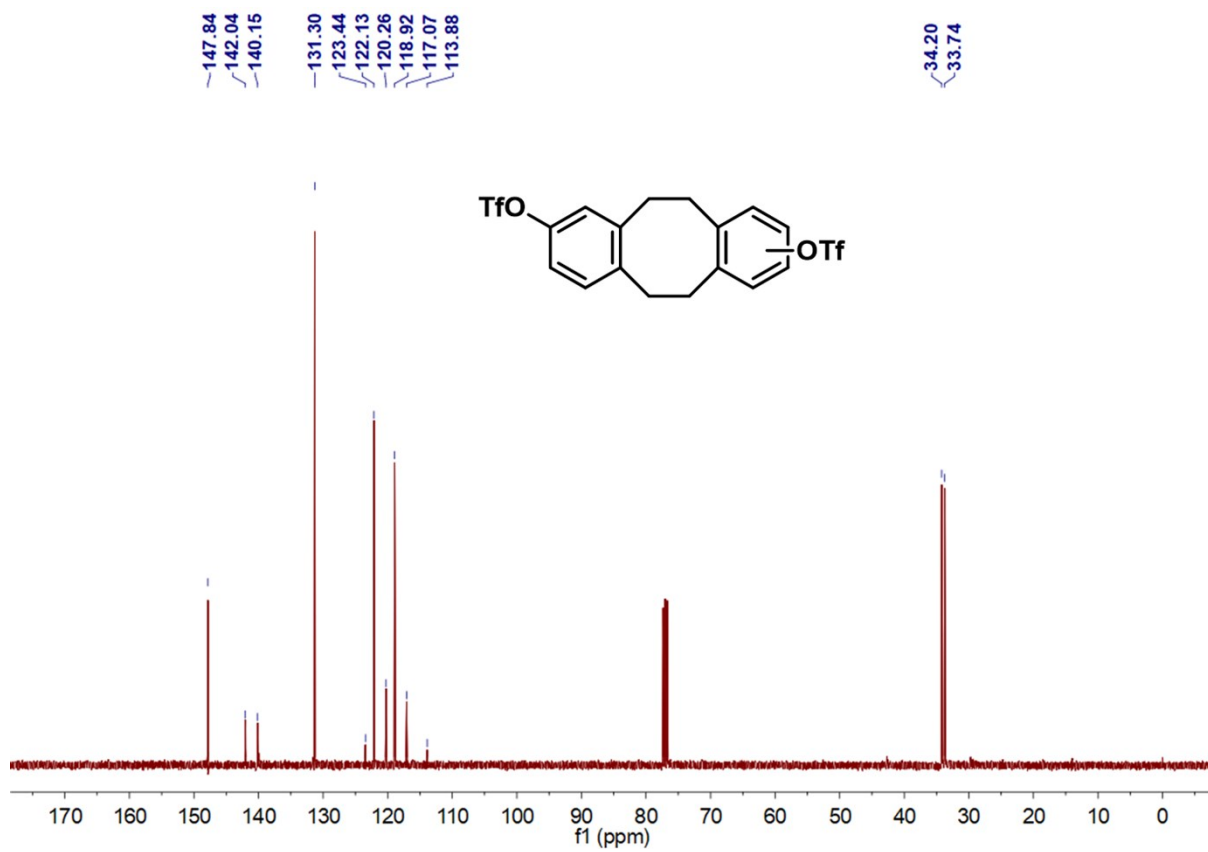

**Fig. S8**  $^{13}\text{C}$  NMR spectrum of the mixture of compounds **7** and **8** in  $\text{CDCl}_3$ .

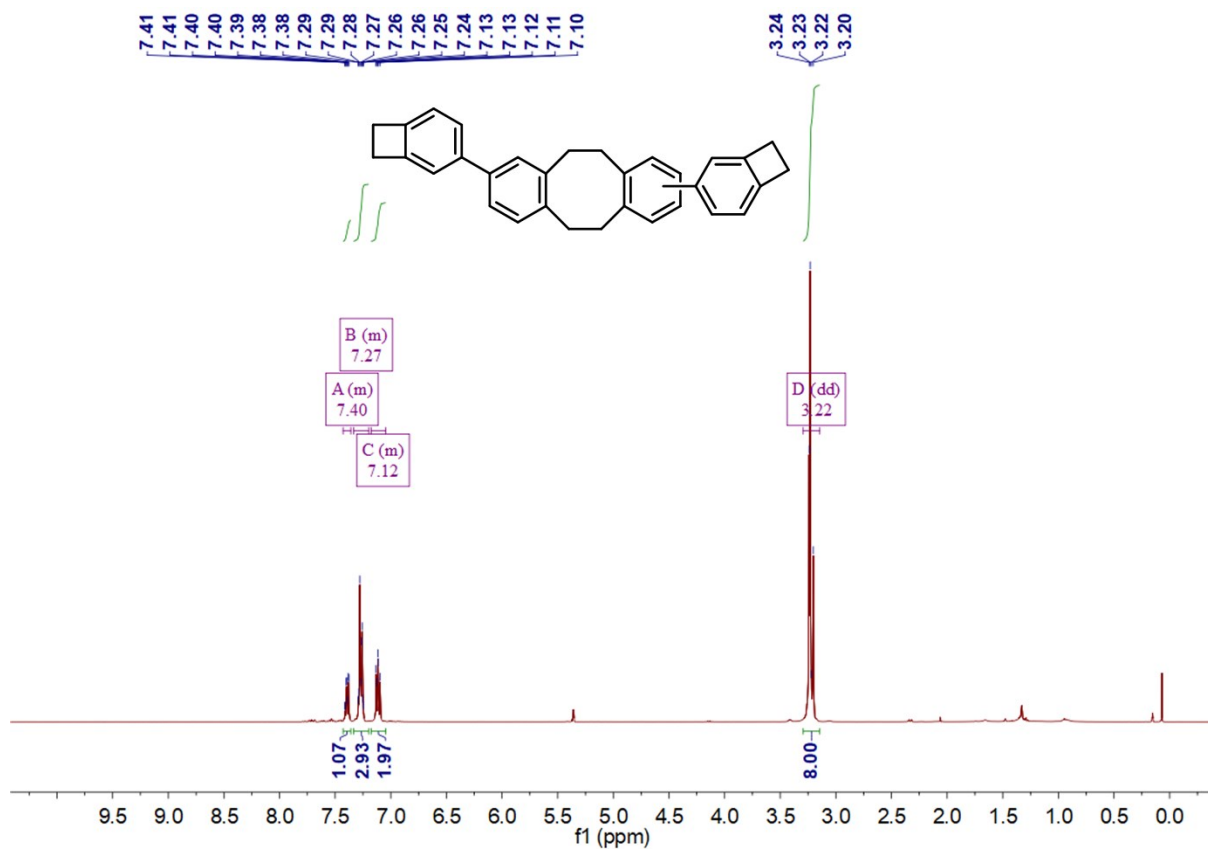

**Fig. S9**  $^1\text{H}$  NMR spectrum of DBCOD-BCB in  $\text{CD}_2\text{Cl}_2$ .

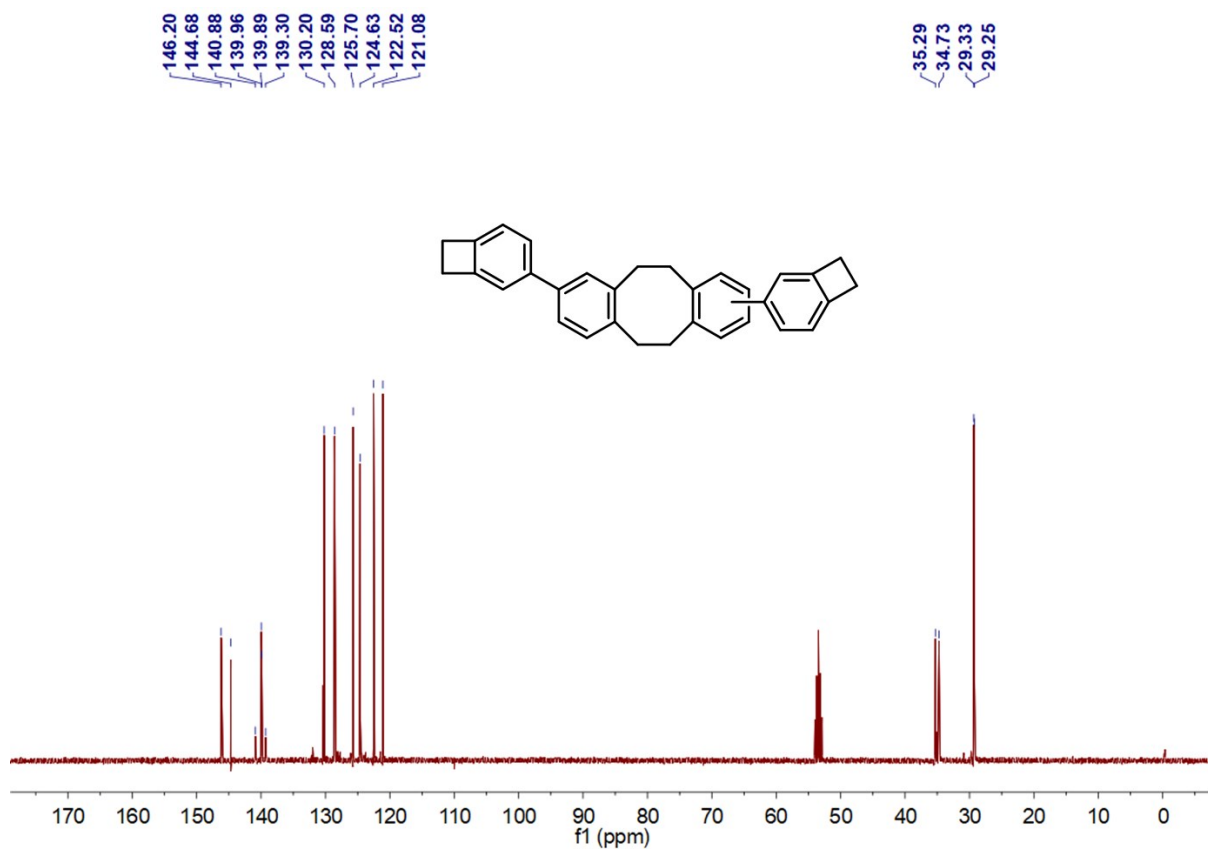

**Fig. S10**  $^{13}\text{C}$  NMR spectrum of DBCOD-BCB in  $\text{CD}_2\text{Cl}_2$ .

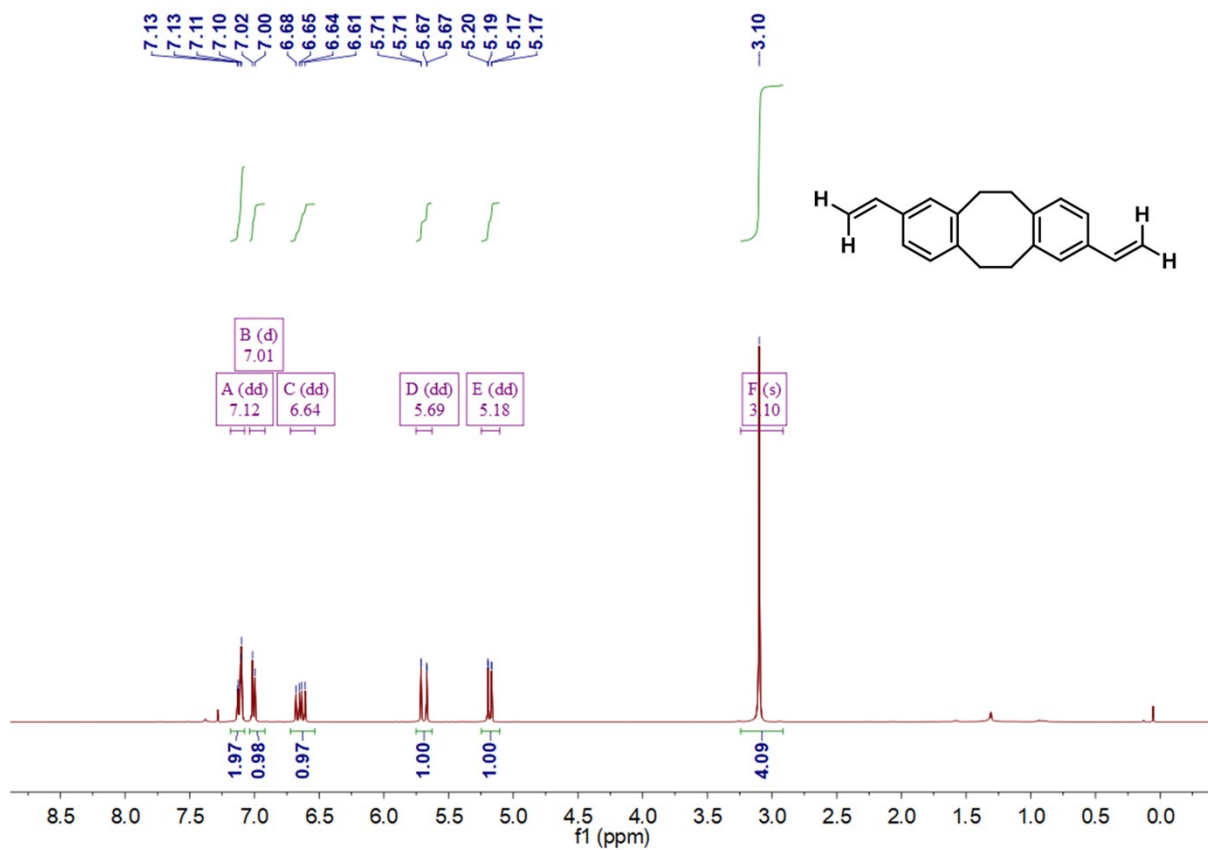

Fig. S11 <sup>1</sup>H NMR spectrum of compound 9 in CDCl<sub>3</sub>.

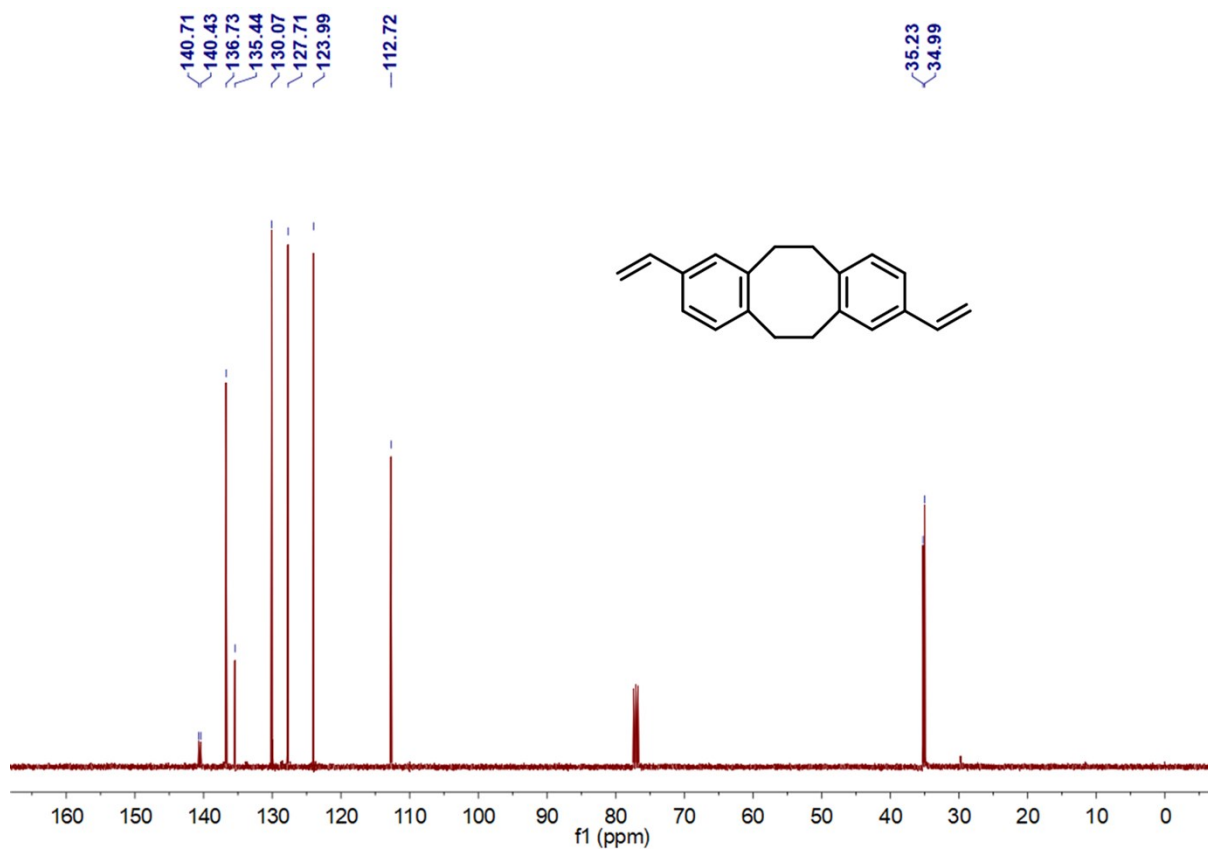

Fig. S12  $^{13}\text{C}$  NMR spectrum of compound 9 in  $\text{CDCl}_3$ .

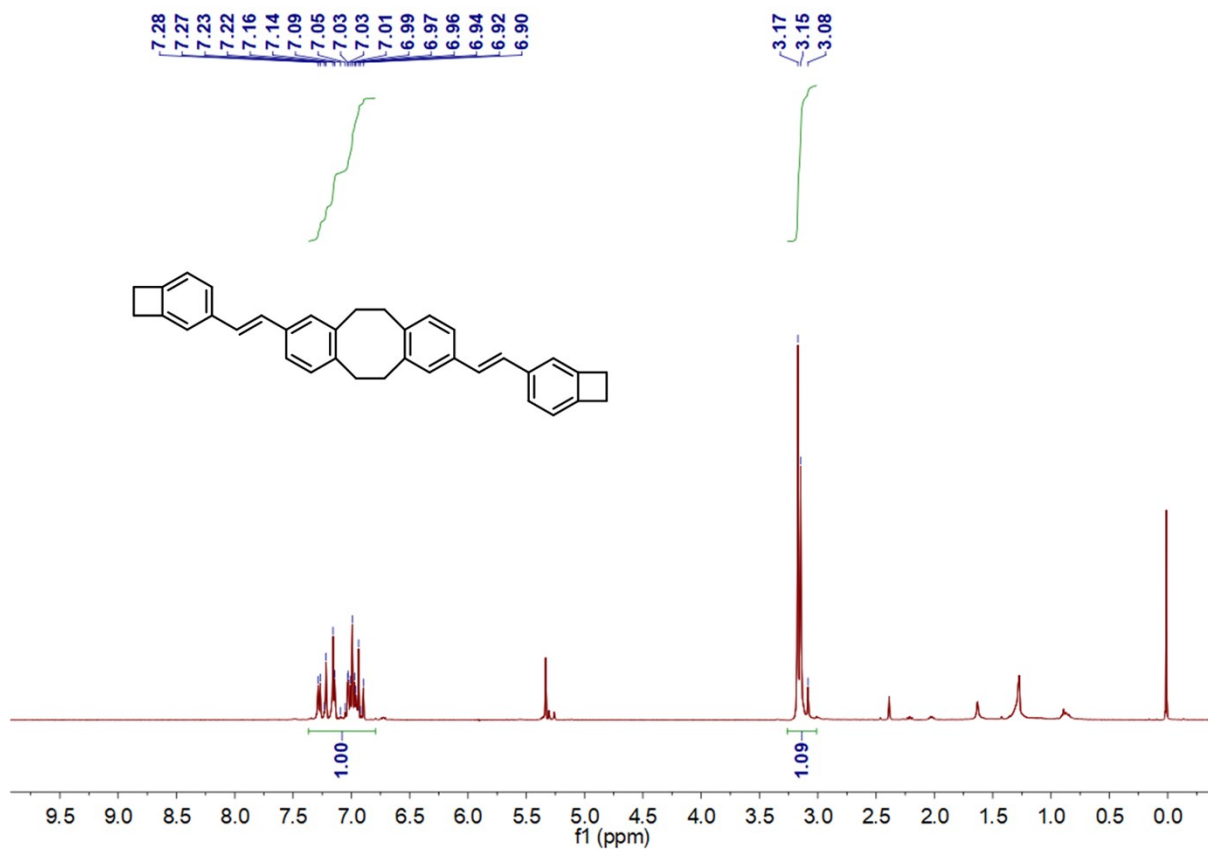

**Fig. S13**  $^1\text{H}$  NMR spectrum of DBCOD-ene-BCB in  $\text{CD}_2\text{Cl}_2$ .

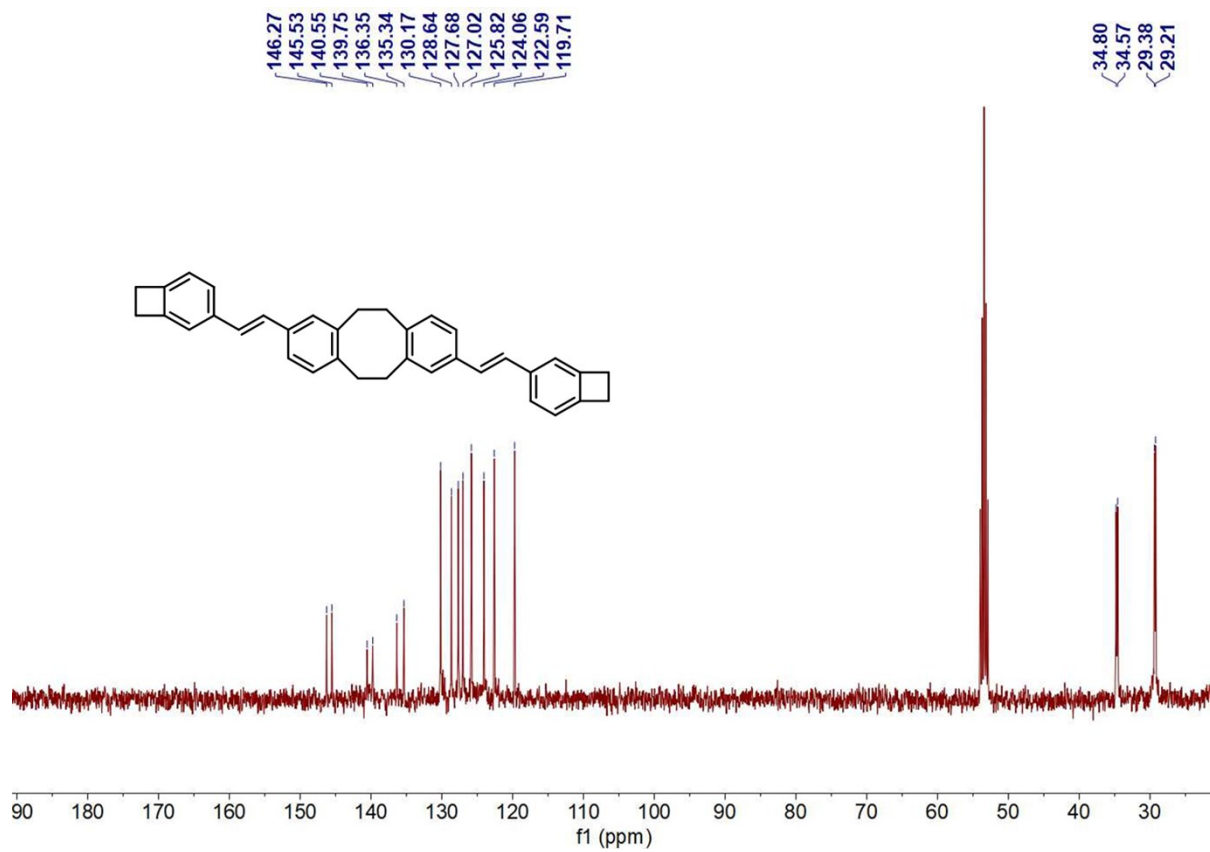

**Fig. S14** <sup>13</sup>C NMR spectrum of DBCOD-ene-BCB in CD<sub>2</sub>Cl<sub>2</sub>.



1 #11 RT: 0.09 AV: 1 NL: 1.31E8  
T: FTMS + p ESI Full ms [100.0000-1000.0000]

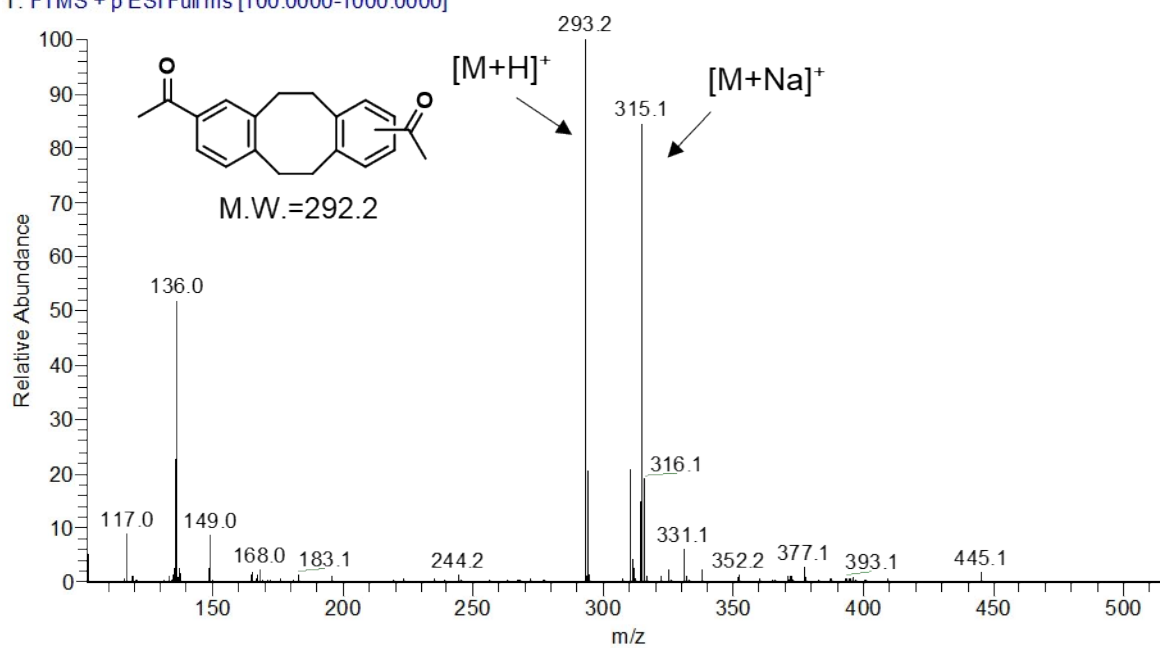

Fig. S15 Mass spectrum of the mixture of compounds 1 and 2.

2 #11 RT: 0.09 AV: 1 NL: 4.30E7  
T: FTMS + p ESI Full ms [100.0000-1000.0000]

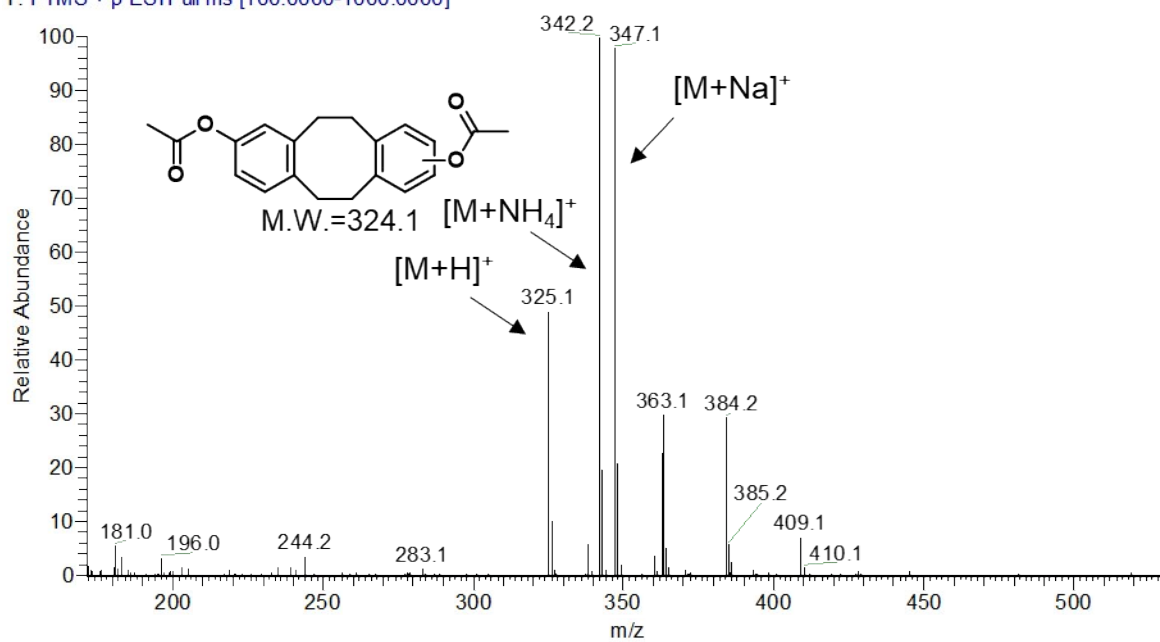

Fig. S16 Mass spectrum of the mixture of compounds 3 and 4.

3\_20210719160412 #10 RT: 0.08 AV: 1 NL: 4.29E7  
T: FTMS + p ESIFull ms [100.0000-1000.0000]

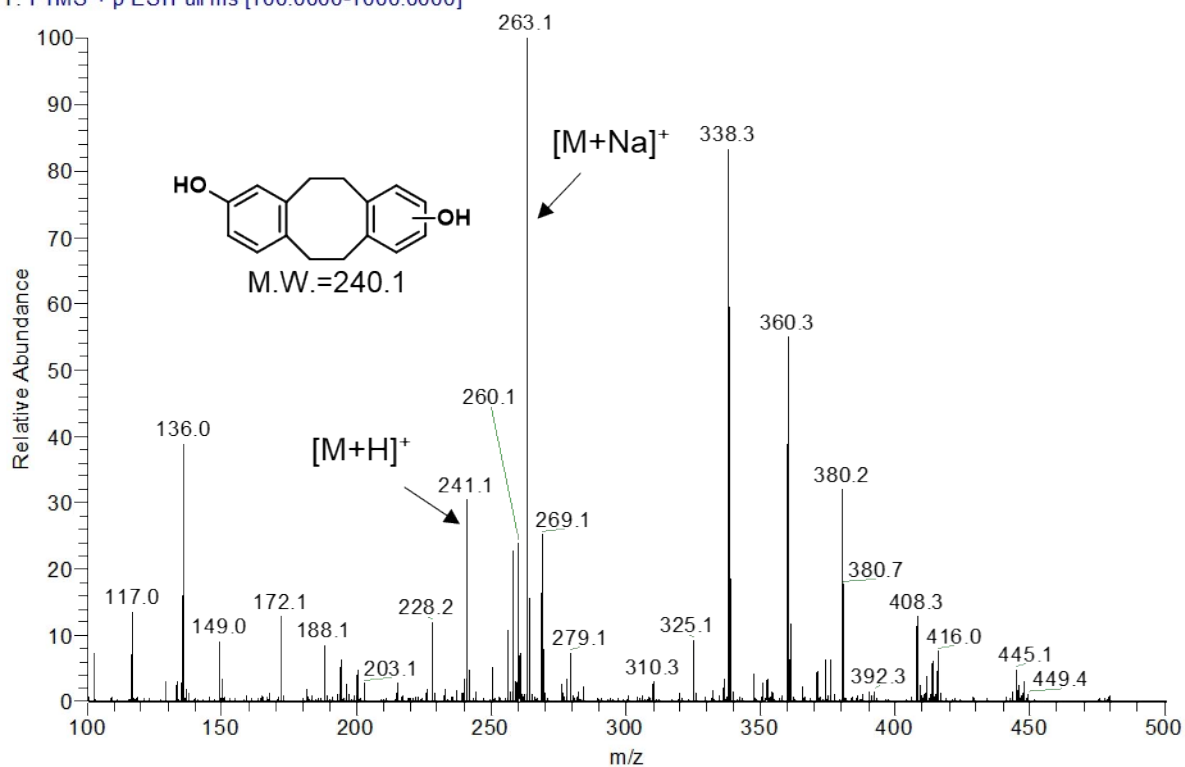

Fig. S17 Mass spectrum of the mixture of compounds 5 and 6.

4 #9 RT: 0.07 AV: 1 NL: 7.17E7  
T: FTMS + p ESIFull ms [100.0000-1000.0000]

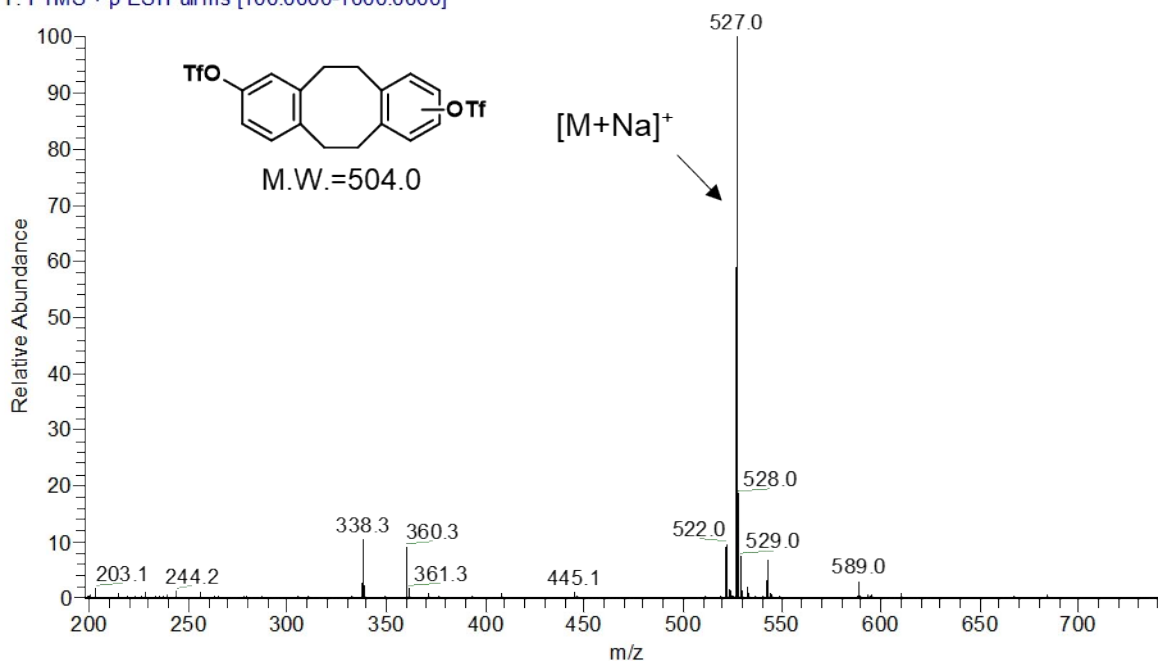

Fig. S18 Mass spectrum of the mixture of compounds 7 and 8.

5 #12 RT: 0.10 AV: 1 NL: 1.68E7  
T: FTMS + p ESI Full ms [100.0000-1000.0000]

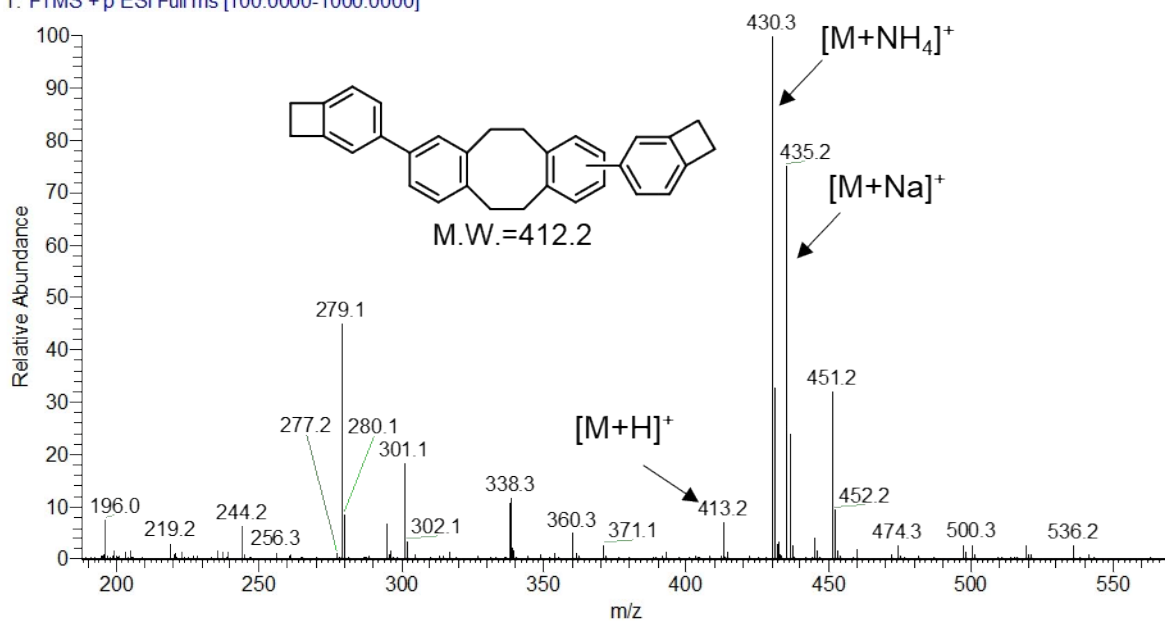

Fig. S19 Mass spectrum of DBCOD-BCB.

6 #10 RT: 0.08 AV: 1 NL: 4.32E7  
T: FTMS + p ESI Full ms [100.0000-1000.0000]

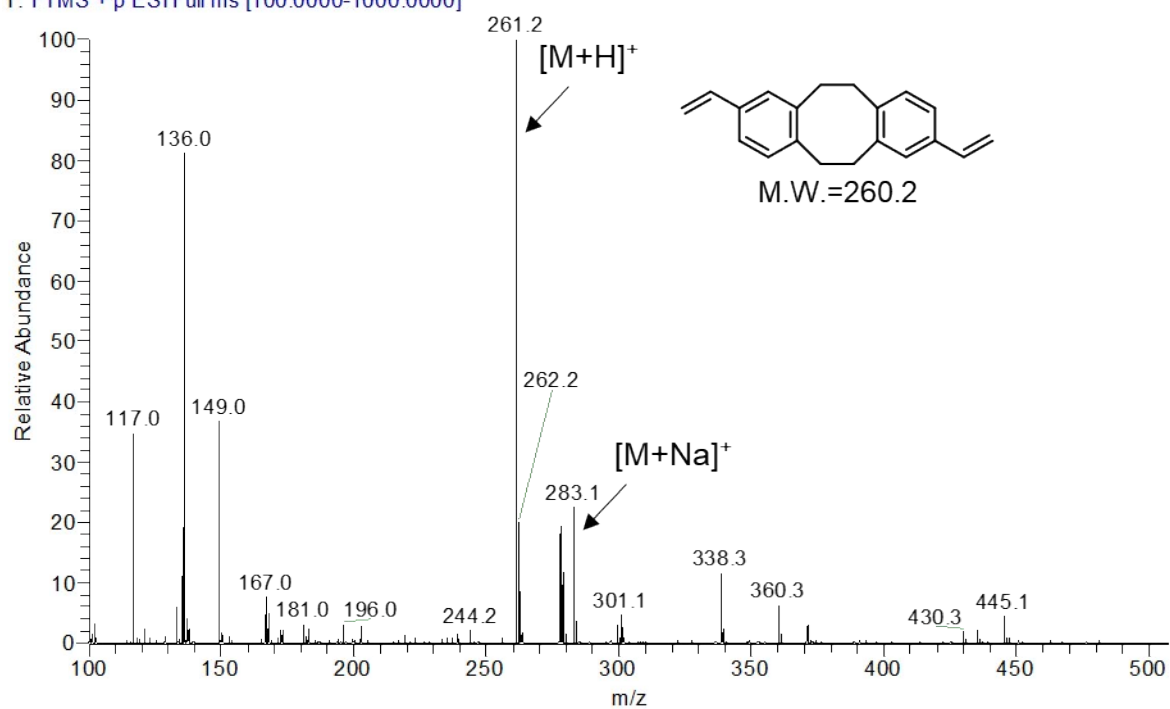

Fig. S20 Mass spectrum of the mixture of compound 9.

7\_20210719160622 #7 RT: 0.06 AV: 1 NL: 9.38E7  
T: FTMS + p ESI Full ms [100.0000-1000.0000]

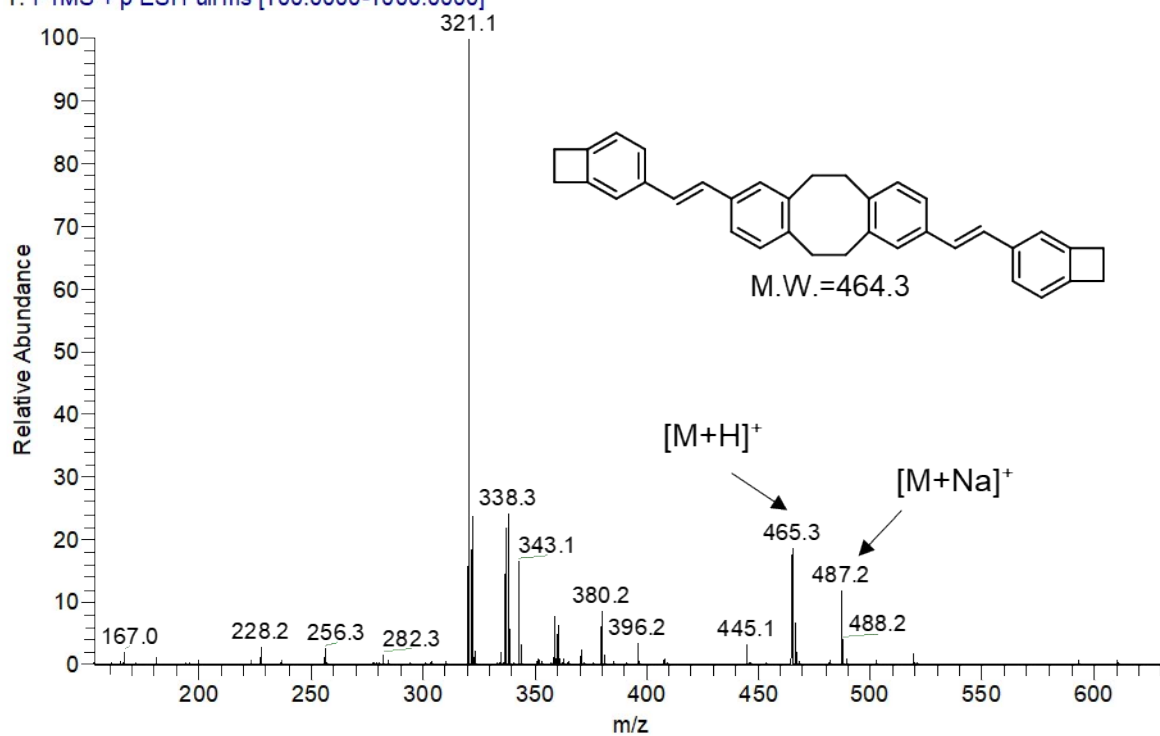

Fig. S21 Mass spectrum of of DBCOD-ene-BCB.

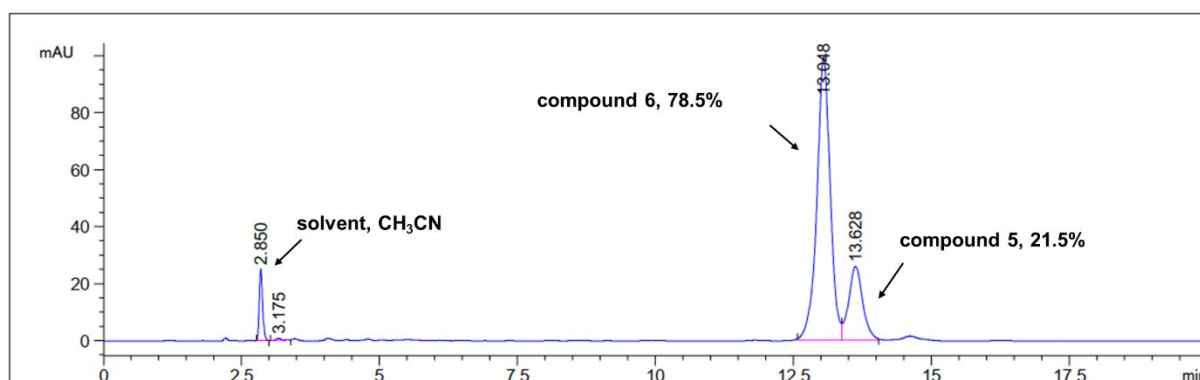

Fig. S22.HPLC analysis result of compounds 5 and 6.

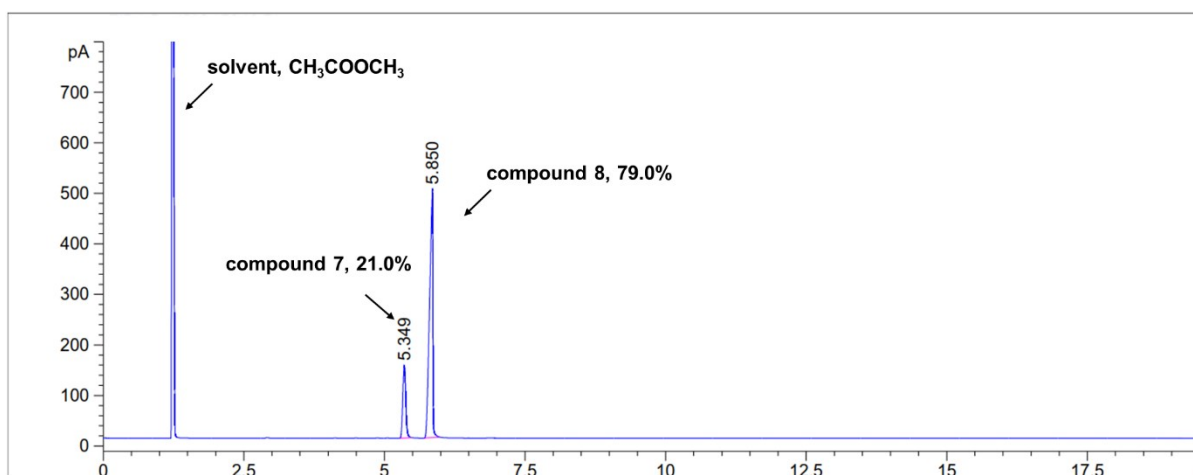

**Fig. S23.** GC analysis result of compounds **7** and **8**.

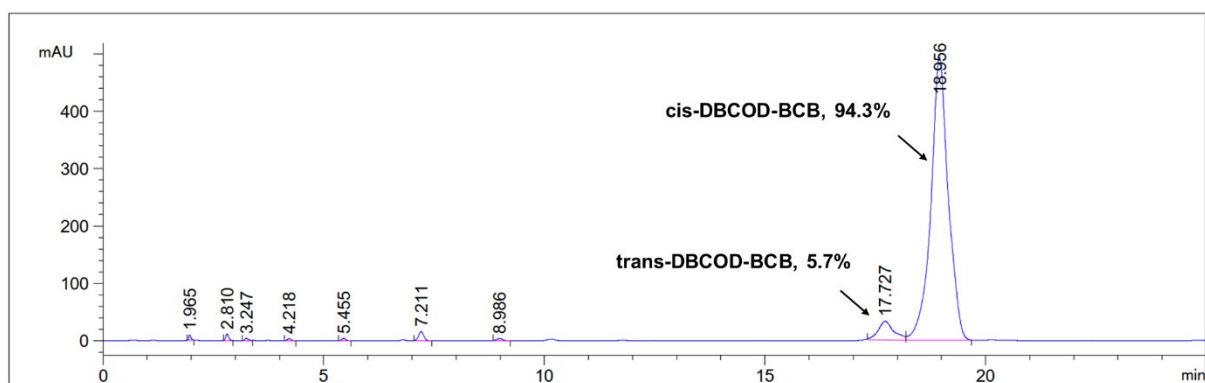

**Fig. S24.** HPLC analysis result of DBCOD-BCB.

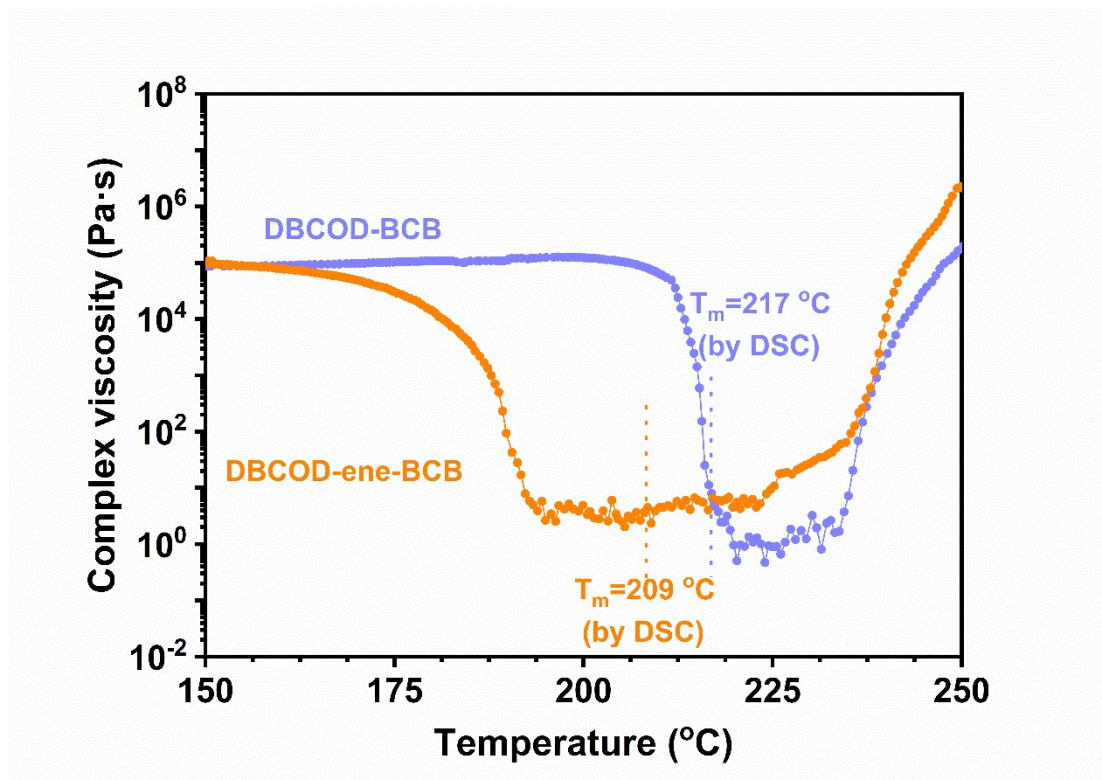

**Fig. S25.** Rheological analysis on complex viscosity of monomers when heated from 150 °C to 250 °C with a ramping rate of 10 °C/min in air
